# Supplementary material for: Preparation and characterisation of zwitterionic sulfobetaine containing siloxane-based biostable polyurethanes
Source: Royal Society of Chemistry journal article supplement (doi:10.1039/d2ma00049k), 2022-01-01
Supplement: d2ma00049k1.pdf [file d2ma00049k1.pdf]

## *Supporting Information*

# **Preparation and Characterisation of Sulfobetaine Zwitterionic Siloxane-based Biostable Polyurethanes**

Zhi-hua Liu<sup>1</sup>, Yong-hao Xiao<sup>1</sup>, Xiao-yu Ma<sup>1</sup>, Xue Geng<sup>1,2</sup>, Lin Ye<sup>1,2</sup>, Ai-ying  
Zhang<sup>1,2</sup> and Zeng-guo Feng<sup>\*1,2</sup>

1. School of Materials Science and Engineering, Beijing Institute of Technology,  
Beijing 100081, China.

2. Beijing Key Laboratory of Construction Tailorable Advanced Functional Materials  
and Green Applications, Beijing 100081, China.

## Contents

1. Synthesis and characterization of sulfobetaine diol (SB-MDEA)
2. FTIR spectra of starting materials
3. <sup>1</sup>H NMR spectra of siloxane-based PC PUs and sulfobetaine modified ones
4. Miscibility of PCDL, PDMS and SB-MDEA in DMAc and DMSO
5. WCA data of siloxane-based PCUs and sulfobetaine modified ones

## 1. Synthesis and characterization of sulfobetaine diol (SB-MDEA)

SB-MDEA with two hydroxyl groups was synthesised from 1,3-propanesultone (PS) and N-methyldiethanolamine (MDEA) (Scheme S1). In short, in a round bottom flask under magnetic stirring, weigh 10 g (0.084 mol) of MDEA and 10.26 g (0.084 mol) of PS and dissolve them in 150 mL of anhydrous DCE. After injecting nitrogen for 20 minutes, the flask was sealed and the mixture was stirred at 40 °C for 15 hours. Then a rotary evaporator was used to remove the solvent from the reaction mixture and a white precipitate was obtained. The product was washed several times with ether to remove unreacted materials, and SB-MDEA was obtained in high yield. Figure S1 exhibits the FTIR spectrum of SB-MDEA. The free and hydrogen bonded O-H stretching vibration absorption peaks appeared at 3450  $\text{cm}^{-1}$  and 3024  $\text{cm}^{-1}$ , respectively. The peaks at 3024  $\text{cm}^{-1}$ ~2866  $\text{cm}^{-1}$  were ascribed to the stretching vibrations of  $\text{CH}_2$  groups in SB-MDEA. The characteristic stretching vibration absorption peak of C-N at 1541  $\text{cm}^{-1}$  and that of the  $\text{SO}_3^-$  at 1038  $\text{cm}^{-1}$  were also clearly observed. The chemical structure was further confirmed by  $^1\text{H-NMR}$  in  $\text{D}_2\text{O}$  as shown in Figure S2.  $\delta$  3.97 ( $\text{CH}_2\text{-OH}$ ), 3.54 ( $\text{CH}_2\text{-CH}_2\text{-N}^+$ ), 3.14 ( $\text{N}^+\text{-CH}_3$ ), 2.90 ( $\text{SO}_3^-\text{-CH}_2$ ), 2.18 ( $\text{CH}_2\text{-CH}_2\text{-CH}_2$ ) ppm. Moreover, mass spectrometry analysis was carried out on a liquid chromatography-mass spectrometer (AGILENT, Q-TOF 6520) equipped with an atmospheric pressure chemical ionisation source (APCI) in positive mode and the solvent used was  $\text{H}_2\text{O}$  and the result is shown in Figure S3. MS (APCI $^+$ ) calcd for  $\text{C}_8\text{H}_{19}\text{NO}_5\text{S}$ : 242.11 for  $[\text{M}+\text{H}]^+$ , 483.20 for  $[\text{2M}+\text{H}]^+$ , 679.26 for  $[\text{3M-CH}_2\text{-CH}_2\text{-OH}+\text{H}]^+$  and 724.30 for  $[\text{3M}+\text{1}]^+$ , found 242.10, 483.10, 679.29 and 724.08.

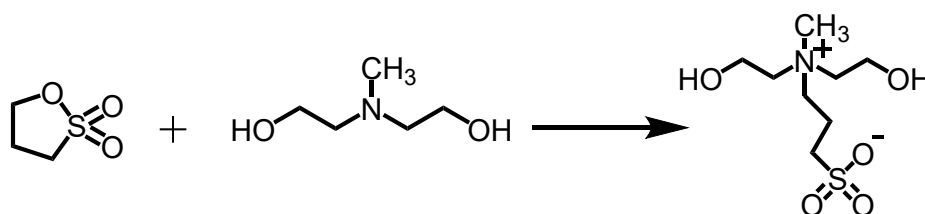

Scheme S1. Synthetic pathway of SB-MDEA.

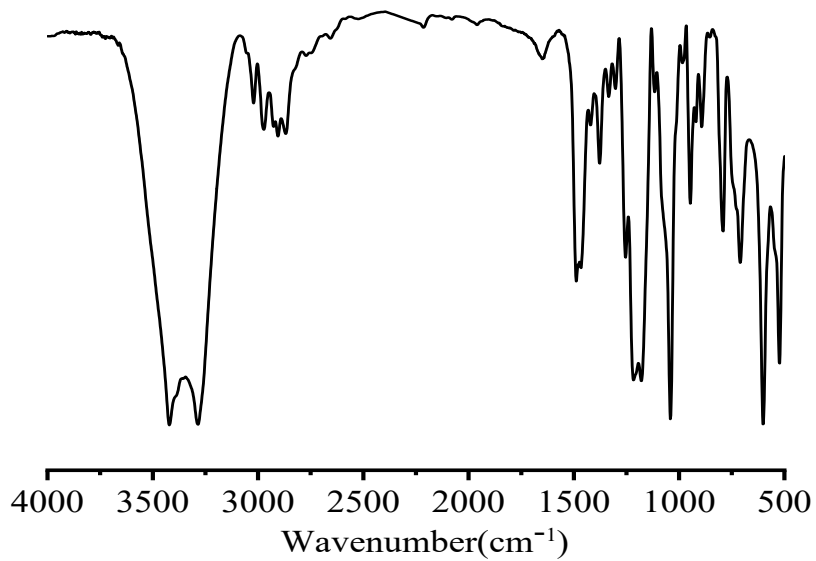

Figure S1. FT-IR spectrum of SB-MDEA.

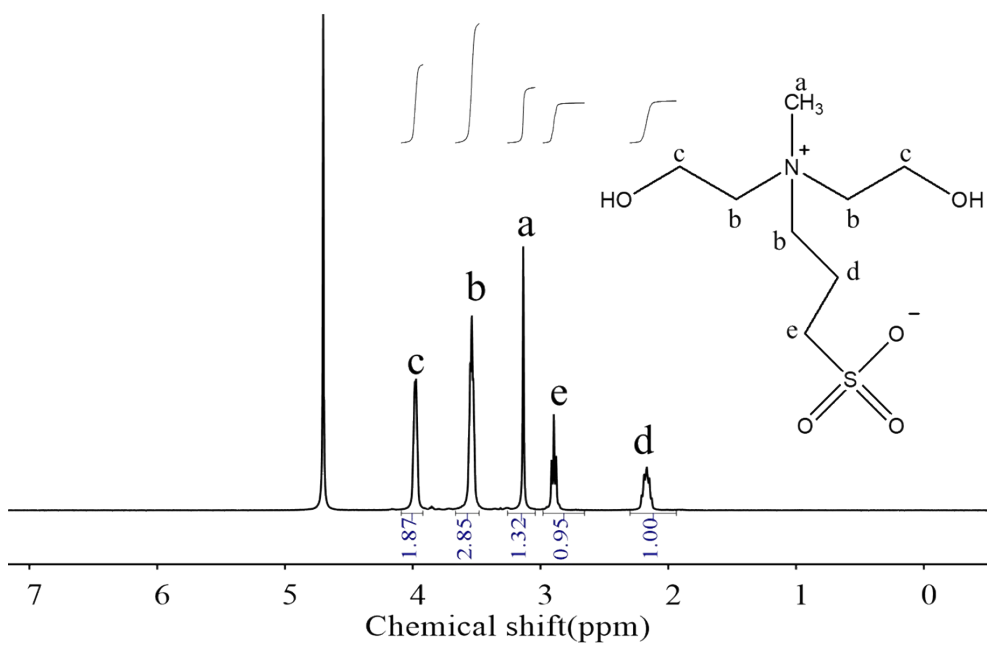

Figure S2. <sup>1</sup>H-NMR spectrum of SB-MDEA in D<sub>2</sub>O.

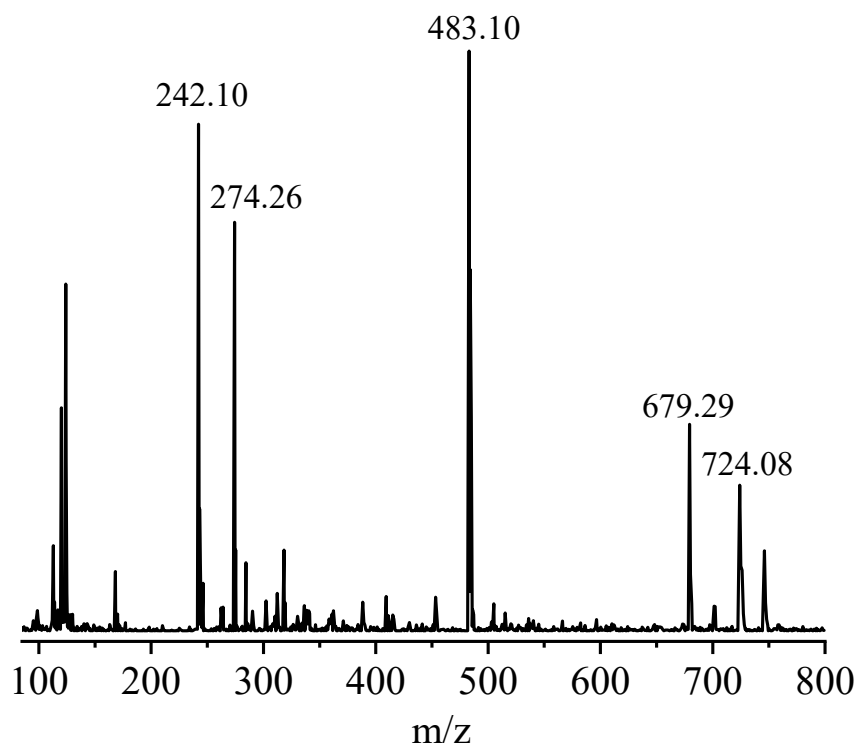

Figure S3. Mass spectrum of SB-MDEA.

## 2. FTIR spectra of starting materials

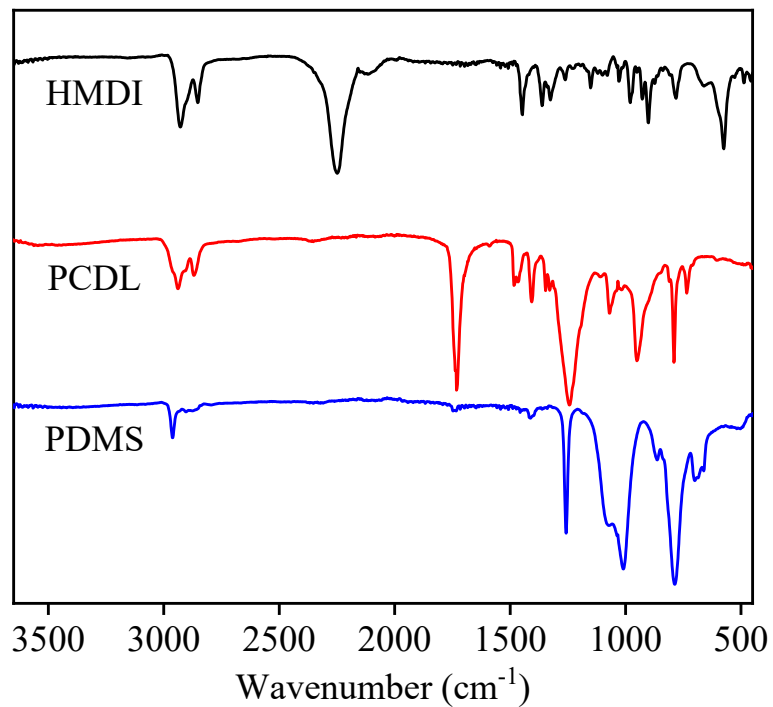

Figure S4. FTIR spectra of HMDI, PCDL and PDMS.

3.  $^1\text{H}$  NMR spectra of siloxane-based PC PUs and sulfobetaine modified ones

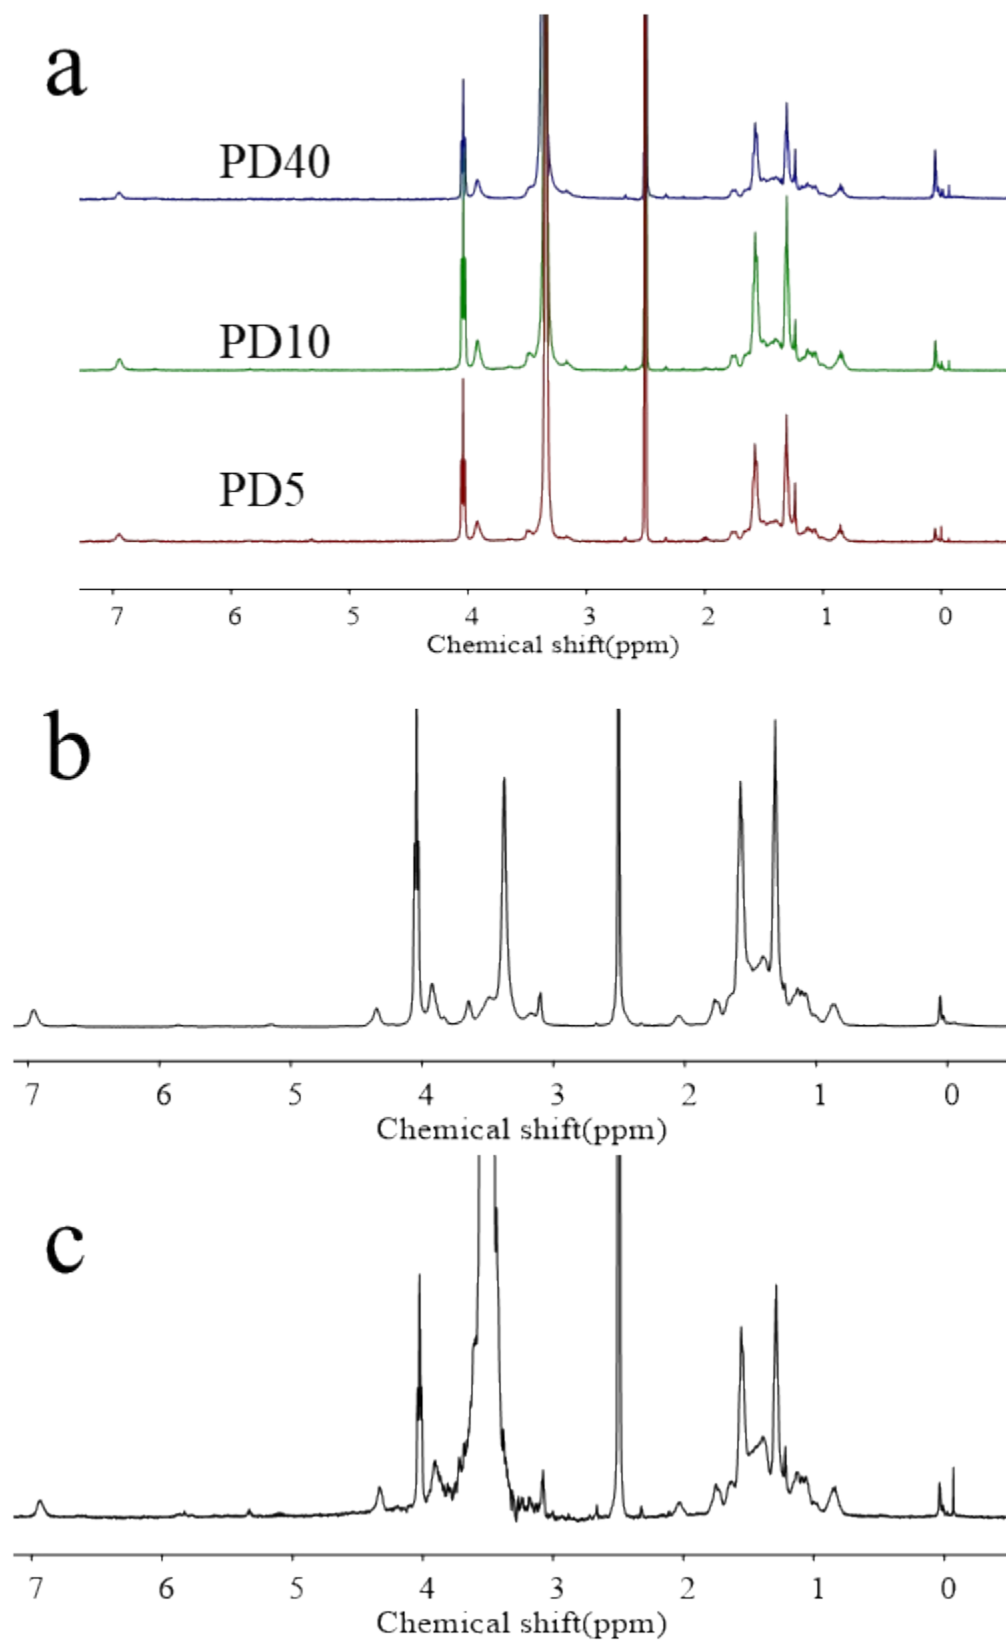

Figure S5.  $^1\text{H}$ -NMR spectra of PD x (a), S2PD20 (b) and S3PD20 (c).

#### 4. Miscibility of PCDL, PDMS and SB-MDEA in DMAc and DMSO

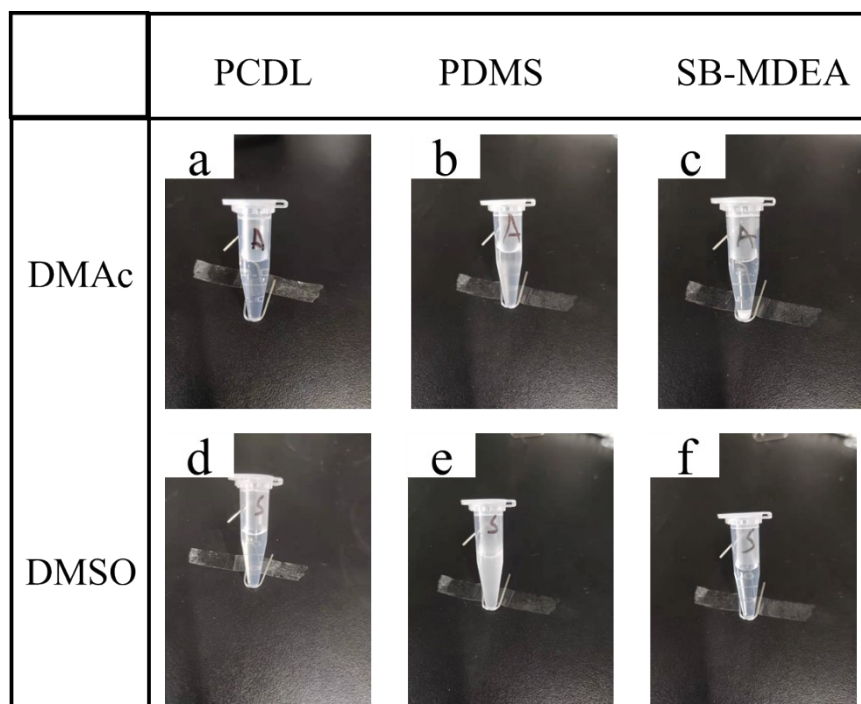

Figure S6. Dissolution of raw materials in different solvents.

#### 5. WCA data of siloxane-based PCUs and sulfobetaine modified ones

Table S1 WCS data (°) of siloxane-based PCUs and sulfobetaine modified ones at 0 s, 10 s, 20 s, 40 s and 60 s

| Sample | 0 s       | 10 s      | 20 s      | 40 s      | 60s       |
|--------|-----------|-----------|-----------|-----------|-----------|
| PC     | 94.3±0.6  | 88.8±1.4  | 87.6±0.9  | 86.1±0.7  | 86.0±1.0  |
| PD5    | 106.2±0.5 | 105.0±0.8 | 104.3±1.3 | 104.0±0.5 | 104.0±0.8 |
| PD10   | 107.3±1.5 | 106.9±1.5 | 106.2±0.6 | 106.6±2.0 | 105.6±0.7 |
| PD20   | 111.4±1.5 | 106.8±1.2 | 104.9±1.0 | 103.9±0.8 | 103.9±1.1 |
| PD40   | 116.8±0.9 | 111.2±1.2 | 110.7±0.8 | 110.0±1.3 | 109.6±0.6 |
| S1PD20 | 93.2±1.0  | 92.1±0.9  | 91.9±0.6  | 91.2±1.0  | 90.9±0.7  |
| S2PD20 | 95.5±0.9  | 93.6±1.2  | 93.0±0.8  | 91.8±1.1  | 91.1±1.5  |
| S3PD20 | 95.1±1.9  | 93.7±1.7  | 93.0±1.2  | 92.7±1.5  | 91.9±0.8  |

Table S2 WCA (°) of sample surfaces of sulfobetaine modified siloxane-based PCUs after the storage under the air atmosphere in different times

| Time (d) | S1PD20   | S2PD20   | S3PD20   |
|----------|----------|----------|----------|
| 0        | 93.2±1.0 | 95.5±0.9 | 95.1±1.9 |
| 3        | 91.9±0.6 | 93.1±1.4 | 94.0±0.7 |
| 6        | 92.2±1.5 | 94.8±0.8 | 96.7±0.4 |
| 10       | 93.9±0.9 | 96.3±0.7 | 94.9±0.7 |
